# MIND TO MIND

Creative writing that explores the abstract side of our profession and our lives

*Stephen T. Harvey, M.D., Editor*

## **Surgery: The Night After**

Susan DuMond, Ph.D.

Soft light floats in from the hallway,  
embracing the narrow bed.  
I lie cradled by  
nurses' low laughter.

I capture the glow,  
Cup it in my hand, wrap  
Fingers around it, watch it  
Pulse, this heartlight.

They opened the leg.  
That is yesterday's knowledge.  
Tonight  
I am without sensation.

Rough spots march down that thigh.  
A line of ants? But no, stitches.  
Hot to the tip of my finger.  
This army holds me together.

Ah! Silver socks! I see them now,  
Adorned and adding warmth.  
One silvery toe ignites the  
Other. Angelic fireworks.

Light dims.  
Eyes close.  
I send sleep to my parts as we  
Drift toward morning.

This poem is one of the finalists of ANESTHESIOLOGY's 2019 annual creative writing competition, The Letheon. pen2paper.susand@gmail.com.

Accepted for publication January 29, 2020. Published online first on March 2, 2020.

Permission to reprint granted to the American Society of Anesthesiologists, Inc. by copyright author/owner. Anesthesiology 2020; 132:1277. DOI: 10.1097/ALN.0000000000003212
